# Supplementary material
Source: publisher figshare collection journal article supplement (https://acs.figshare.com/ndownloader/files/4369099)
Supplement: Supplementary file 1 [file 4369099]

# Supporting Material for “ $\beta$ -Sheet $^{13}\text{C}$ Structuring Shifts Appear only at the H-bonded Sites of Hairpins” I. Shu, J. M. Stewart, M. Scian, B. L. Kier and N. H. Andersen

## Methods and materials

### *Peptide Models: Selection and Synthesis*

Most of the peptides examined in the present study have been prepared previously, the present study includes  $^{13}\text{C}=\text{O}$  isotopomers of the previous constructs. In all cases, the peptide series have been thoroughly characterized by NMR and CD studies (Fesinmeyer, 2005a; Andersen, 2006; Kier, 2008; Eidenschink, 2009a; Kier, 2010).<sup>1-5</sup> A wide variety of hairpin fold stabilities are included as a result of both strand and turn mutations in the MrH peptide series (Maynard, 1998; Fesinmeyer, 2005a; Eidenschink, 2009a).<sup>1,4,6</sup> Unstructured coil reference peptides, including species with a higher proportion of  $\beta$ -branched residues that might be expected to prefer extended-strand configurations, were constructed with and without  $^{13}\text{C}'$  labels at valine and alanine; these appear in Table S1.

All peptide hairpins were synthesized (at a 100 or 250  $\mu\text{mol}$  scale) on an Applied Biosystem 433A peptide synthesizer using standard Fmoc solid-phase peptide synthesis methods. Wang resins preloaded with the C-terminal amino acid were employed. C-terminal amides were prepared similarly but using Rink resins.  $^{13}\text{C}'$ -labeled valine and alanine were converted to their Fmoc derivative using Fmoc-OSu (N-fluorenylmethyl succinimidyl carbonate) in acetone-water mixtures containing  $\text{NaHCO}_3$  (16 h with stirring). N-terminal acetylation was performed by adding the peptide bound resin to the 3mL DMF (N,N-dimethylformamide)/95  $\mu\text{L}$  acetic anhydride/140  $\mu\text{L}$  triethylamine mixture and shaking for 1 hr. Peptides are cleaved from the resin using a 95:2.5:2.5 trifluoroacetic acid (TFA): tri-isopropylsilane: water mixture. The cleaved peptides were purified by reverse phase HPLC on a Varian (or Agilent) C18 prep-scale column using gradients of water/acetonitrile (having 0.1% and 0.085% TFA respectively). Collected fractions were lyophilized and their identity and molecular weight confirmed using a Bruker Esquire Ion Trap mass spectrometer. Sequence and purity were verified by  $^1\text{H}$  NMR.

Table 1. Control Peptides Examined.

#### Random coil control

|             |                            |
|-------------|----------------------------|
| RCA         | Ac-GKAAAK-NH <sub>2</sub>  |
| $\beta$ RCA | Ac-KIAVSAK-NH <sub>2</sub> |
| $\beta$ RCV | Ac-KITVSAK-NH <sub>2</sub> |
| RCV         | Ac-GKAAAK-NH <sub>2</sub>  |
| MrH2        | Ac-GKKITVSA                |
| RCV2        | Ac-KAAVAA                  |

### *NMR Data Collection*

All NMR samples are prepared at 0.5 – 2 mM peptide concentration in 50 mM, pH 6.0 potassium phosphate buffer, with 10%  $\text{D}_2\text{O}$ , DSS (2,2-dimethyl-2-silapentane-5-sulfonate) and/or  $^{13}\text{C}$  urea as internal reference standards. Deuterated hexafluoroisopropanol (HFIP) or  $\beta$ -trifluoroethanol (TFE) was added to the vol-% as noted; the aqueous portion was added by pipette with the volatile fluoroalcohol

delivered by glass microliter syringes. For natural abundant  $^{13}\text{C}$  experiments, the samples were prepared using  $\text{D}_2\text{O}$  buffers.

The  $^{13}\text{C}'$  chemical shifts of isotopically labeled valine and alanine residues were obtained from 1D  $^{13}\text{C}$  experiment on a Bruker AV500 instrument at 125.72 MHz with a 30 ppm spectral width (32K points), centered at 169 ppm, and 64 – 512 scans depending on sample concentration and signal to noise.  $^{13}\text{C}$ -urea served as the internal shift reference as previously described (Fesinmeyer, 2005b).<sup>7</sup> For aqueous medium without cosolvent addition, the  $^{13}\text{C}$ -urea shift (in ppm) is given by  $\delta = 165.609 - 0.0056 \times T$  ( $T = ^\circ\text{C}$ ).

$^{13}\text{C}_\alpha$  and  $^{13}\text{C}_\beta$  chemical shifts of all residues were measured by a natural abundance 2D  $^1\text{H}$ - $^{13}\text{C}$  HSQC experiment (Vuister, 1992)<sup>8</sup> on Bruker DRX instrument ( $^1\text{H}/^{13}\text{C}$  499.85/125.69 MHz), spectral width 10/85 ppm, center frequency at 3.80/37.00 ppm, with 1024/256 time domain points and 80 scans.  $^{13}\text{C}$  nuclei were assigned by the cross peaks associated with the covalently bonded  $^1\text{H}$  frequencies based on previously reported data or proton assignments through a combination of 2D  $^1\text{H}$ - $^1\text{H}$  TOCSY and NOESY experiments with WATERGATE (Piotto, 1992)<sup>9</sup> solvent suppression. TOCSY employed a 80ms MLEV-17 spinlock (Bax, 1985)<sup>10</sup> and NOESY a 150ms mixing time for 8 and 16 scans, respectively.

#### *Hairpin Fold Population Determination*

Previously published proton random coil values and near-neighbor sequence corrections (Fesinmeyer, 2005a; Eidenschink, 2009a)<sup>1,4</sup> are used throughout to determine  $^1\text{H}_\alpha$  and  $^1\text{H}_\text{N}$  CSDs ( $\delta_{\text{obs}} - \delta_{\text{random coil}}$ ). Diagnostic 100%-folded  $^1\text{H}$  CSD reference values have been established (Eidenschink, 2009a, Kier, 2008, 2010)<sup>4,5</sup> for the MrH, and  $\beta\text{cap}$  scaffolds employed herein. The diagnostic sites employed are cross-strand directed  $\text{H}_\alpha$ 's,  $\text{H}_\text{N}$ 's (Fesinmeyer, 2005a)<sup>1</sup>, and protons with larger shifts ( $> 1$  ppm) due to ring current effects. Fold population (fraction folded,  $\chi_\text{F}$ ) is thus determined as  $\text{CSD}_{\text{obs}}/\text{CSD}_{100\%}$  from each of the diagnostic protons and averaged. In the case of the  $\beta\text{cap}$  hairpins, the 100% folded CSDs have been verified by backbone amide exchange protection factors; there are representatives of these folds with  $\chi_\text{F} > 0.97$  based on the exchange protection factors (Kier, 2008, 2010)<sup>3,5</sup>.

#### *$^{13}\text{C}$ CSD Calculations*

A number of compilations of experimental  $^{13}\text{C}$  random coil shift values have appeared and each was examined for applicability to the present study. As proved the case of  $^1\text{H}$  shifts, we found the values reported by Wishart et al. (1995)<sup>11</sup> using Ac-GGXAGG-NH<sub>2</sub> and Ac-GGXPGG-NH<sub>2</sub> peptide models provided the near zero  $^{13}\text{C}$  CSDs for our control peptides. The differences for  $^{13}\text{C}_{\alpha/\beta}$  shifts were all  $< 0.2$  ppm. In the case of our  $^{13}\text{C}'$  reference peptides (Table 1S), the apparent CSD calculated using the literature coil shifts was  $-0.32 \pm 0.13$  ppm. This difference may represent the absence of the urea denaturant in our medium. Solvent induced changes in  $^{13}\text{C}'$  shifts were context dependent and quite large (Table 2S); as a result, we used direct differencing between observed shifts for hairpin models using the most similar controls at the matching solvent conditions and temperature to derive our CSDs. HFIP addition effects on  $^{13}\text{C}_\alpha$  and  $^{13}\text{C}_\beta$  shifts were, to the extent examined, similar to those observed for  $^{13}\text{C}'$ ;

these will be detailed in the subsequent full account of this work. Based on this data, all  $^{13}\text{C}_{\alpha/\beta}$  CSDs were only calculated for aqueous medium lacking co-solvent addition. For the present account, the observed C' shifts of  $\beta\text{RCA}$  and  $\beta\text{RCV}$  in each medium were used to calculate all of the  $^{13}\text{C}'$  CSDs reported.

Table 2S. Solvent effects on  $^{13}\text{C}'$  shifts referenced to DSS at 280K

|                                 | $\Delta\delta$ (cosolvent), ppm |          |         |
|---------------------------------|---------------------------------|----------|---------|
|                                 | 8% HFIP                         | 20% HFIP | 30% TFE |
| $^{13}\text{C}=\text{O}$ shifts |                                 |          |         |
| KAAAK                           | +0.26                           | +1.41    | -2.34   |
| KIAVS                           | +0.21                           | +1.58    | -2.62   |
| GKAVAA                          | +0.26                           |          |         |
| KAVAA                           | +0.16                           | +1.03    | -2.64   |
| KTVSK                           | +0.22                           |          |         |
| KIVTS                           | +0.26                           | +1.16    |         |
| $^{13}\text{C}$ -Urea           | +0.45                           | +1.05    | -2.33   |

## Results

The observed  $^{13}\text{C}'$  CSDs and fraction folded measures for the isotopically labeled species examined appear in Table 3S.

Table 3S :  $^{13}\text{C}=\text{O}$  labeled residue chemical shifts in  $\beta$  constructs under aqueous and co-solvent conditions (as specified). Sites that would be cross-strand H-bonded in the hairpin form are underlined. Values in red are CSDs for NHB sites.

| Name                     | Sequence                                                                         | $\chi_F$<br>(280K) | CSDs (ppm)   |              | Co-solvent | $\chi_F$<br>(280K) | CSDs (ppm)   |              |
|--------------------------|----------------------------------------------------------------------------------|--------------------|--------------|--------------|------------|--------------------|--------------|--------------|
|                          |                                                                                  |                    | N-Val        | C-Val        |            |                    | N-Val        | C-Val        |
| MrH3b                    | KKYT <u>V</u> SI-pG-KK <u>I</u> T <u>V</u> SA                                    | 0.604              | -1.74        | -1.14        | 8% HFIP    | 0.817              | -1.99        | -1.27        |
| MrH5b-2                  | KKYT <u>V</u> SI-pG-KK <u>V</u> T <u>V</u> SA                                    | 0.554              | -1.63        | -1.04        | 8% HFIP    | 0.831              | -2.09        | -1.27        |
| MrH5b                    | KKYT <u>V</u> SI-pG-KK <u>V</u> T <u>V</u> SA                                    | 0.554              | -1.60        | -0.91        | 8% HFIP    | 0.831              | -2.09        | -1.32        |
| MrH4e                    | KKL <u>T</u> <u>V</u> SI-UG-KK <u>I</u> T <u>V</u> SA                            | 0.519              | -1.48        | -0.50        | 20% HFIP   | $\geq 0.96$        | -2.08        | -1.25        |
| MrH4b                    | KKL <u>T</u> <u>V</u> SI-pG-KK <u>I</u> T <u>V</u> SA                            | 0.481              | -1.34        | -0.49        | 8% HFIP    | 0.830              | -1.92        | -1.17        |
| MrH6e                    | KKL <u>T</u> <u>V</u> SI-UG-KK <u>I</u> <u>V</u> TSA                             | 0.470              | -1.06        | <b>0.43</b>  | 20% HFIP   | 0.525              | -1.14        | <b>0.40</b>  |
| MrH3b-VTS                | KKY <u>V</u> T <u>S</u> I-pG-KK <u>I</u> <u>V</u> TSA                            | 0.318              | <b>-0.17</b> | <b>0.32</b>  | 8% HFIP    | 0.464              | <b>-0.15</b> | <b>0.28</b>  |
| MrH4a                    | KKL <u>T</u> <u>V</u> SI-NG-KK <u>I</u> T <u>V</u> SA                            | 0.232              | -0.52        | -0.18        | n.a.       |                    |              |              |
| MrH4a-T13A               | KKL <u>T</u> <u>V</u> SI-NG-KK <u>I</u> <u>A</u> <u>V</u> SA                     | 0.13               | -0.33        | -0.24        | n.a.       |                    |              |              |
| MrH3d                    | KKYT <u>V</u> SI- <u>P</u> G-KK <u>I</u> T <u>V</u> SA                           | $\approx 0.10$     | n.d          | n.d          | 30% TFE    | 0.52               | -0.96        | -0.94        |
| Ac-MrH3d <sup>(a)</sup>  | Ac-KKY <u>T</u> <u>V</u> SI- <u>P</u> G-KK <u>I</u> T <u>V</u> SA                | $\leq 0.096$       | <b>-0.05</b> | <b>-0.05</b> | 8% HFIP    | $\leq 0.108$       | <b>-0.09</b> | <b>-0.09</b> |
|                          |                                                                                  |                    | <b>A</b>     | <b>V</b>     | 30% TFE    | 0.33               | -0.73        | -0.62        |
| $\beta\text{cap6-NG(A)}$ | Ac-W <u>I</u> <u>A</u> <u>V</u> TI-NG-KK <u>I</u> R <u>V</u> WTG-NH <sub>2</sub> | 0.71               | <b>-0.47</b> | -1.55        | n.a.       |                    |              |              |
| control <sup>(b)</sup>   | Ac-- <u>I</u> <u>A</u> <u>V</u> TI-NG-KK <u>I</u> R <u>V</u> WTG-NH <sub>2</sub> | $< 0.11$           | +0.22        | +0.16        | n.a.       |                    |              |              |
| $\beta\text{cap6-HG(A)}$ | Ac-W <u>I</u> <u>T</u> <u>A</u> TI-HG-KK <u>I</u> R <u>V</u> WTG-NH <sub>2</sub> | 0.90               | -2.23        | -2.14        | n.a.       |                    |              |              |

<sup>(a)</sup> Ac-MrH3d, with an L-Pro replacing the usual D-Pro in the turn, serves as an additional coil control in water: using the  $\beta\text{RCV}$  shift values, the CSDs are insignificant (-0.05 ppm). Consistent with prior conclusions based on  $^1\text{H}$  CSD changes (Fesinmeyer, 2005a), MrH3d (and its acetylated form) populate the hairpin fold in 30% TFE.

<sup>(b)</sup> The N-terminal Trp deletion destroys the  $\beta$ -cap, yielding a peptide sequence that has no detectable hairpin fold population in water.

The CSD data for MrH peptides appearing in Table 3S was employed to generate the correlation appearing as Figure 2 in the communication text. The CSDs for the H-bonded valine sites in the N- and C-terminal strands were averaged and then plotted versus the fraction folded obtained from the validated  $^1\text{H}$  CSDs. Extrapolation to  $\chi_F = 1.0$  leads to a fully-folded reference value of -2.19 ppm for H-bonded  $^{13}\text{C}'$  sites. The average, and standard error of the 100% folded values is  $-2.09 \pm 0.61$  ppm. When only the more shifted HB-valine sites in the N-terminal strand are used, an equally linear correlation is obtained; and the 100% folded value is  $-2.54 \pm 0.29$  ppm. These site-specific effects are discussed below.

The  $^{13}\text{C}$  shift effects are conveniently categorized using the  $\beta$ -hairpin nomenclature presented below. T indicates turn positions (which can be from 2 to 4 in number), and S indicates strand positions numbered from the turn locus.  $S \pm$  even-numbered positions are non-H-bonded and have their  $\text{H}_\alpha$ 's directed inward;  $S \pm$  odd-numbered strand positions (with the exception of  $S - 1$ ) are designated as H-bonded sites. An  $(S - 1, \text{T1}, \text{T2}, S + 1)$ - $\beta$ -turn sequence is often described as the  $i, i+1, i+2$  and  $i+3$  positions of a four residue turn in a [2:2]- or [2:4]-hairpin (Sibanda and Thornton, 1991)<sup>12</sup>. This nomenclature maintains the  $S \pm \text{odd} / S \pm \text{even}$  designations for H-bonded versus non-bonded sites remote from the turn. The  $S+1$  sites also have an H-bonded carbonyl and can be included in the HB category. The  $S-1$  site is H-bonded in some tight turns as well as in [3:5]- and [4:6]-hairpins.

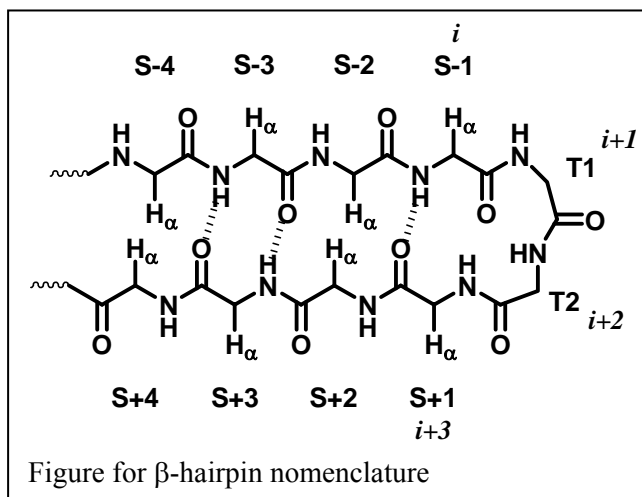

For the MrH peptides,  $^{13}\text{C}'$  labels were predominantly at the  $S - 3$  and  $S + 5$  positions, where the two labeled residues are not cross-strand hydrogen bonded with each other. Regardless of the fold population which varied based on mutations and media fluoroalcohol-content, the N-terminal  $^{13}\text{C}'$  has a greater CSD magnitude than the C-terminal site. The trend was observed in the MrH5b peptides even shown by the different hydrogen bonded positions in the 2<sup>nd</sup> strand. MrH5b-2 and MrH5b have an identical sequence, but the C-terminal Val is labeled at  $S + 5$  and  $S + 3$  (hydrogen bonded with the N-terminal Val), respectively. In aqueous solution, the N-terminal Val CSD is -1.6 ppm, and the C-terminal V12, V14 are both smaller in CSD magnitudes, -1.04 and -0.91 ppm. Although the fold population is improved from 55% to 83% when 8% HFIP is added, the C-terminal carbonyls are still less upfield shifted (CSDs were -1.27 and -1.32 ppm) than the N-terminal (-2.09 ppm). We can not generalize this phenomena for all hairpins, since we have examined only a few isotopically labeled hairpins that are not based on MrH model.

### Integrity of the $^{13}\text{C}_{\alpha/\beta}$ Pattern in Another $\beta$ Sheet Model

The data for the  $\beta$ -capped species and the corresponding capped turn microprotein (Kier, 2008)<sup>3</sup> provide an example (Table 4S and Figure 4S). These hairpins, with the same  $\beta$ -capping motif, have relatively immobilized termini when compared to non-capped isolated  $\beta$  hairpins (Kier, 2010)<sup>5</sup>. As a result, the

Table 4S: Testing the generality  $^{13}\text{C}_{\alpha/\beta}$  CSD patterns. Red underlined sites are expected to display the  $\text{C}_\alpha$  downfield/ $\text{C}_\beta$  upfield pattern; the black underlined positions are not as clearly of the H-bonded type.

| Peptide                | Sequence                                                                                                                                                |
|------------------------|---------------------------------------------------------------------------------------------------------------------------------------------------------|
| $\beta\text{cap-INGK}$ | $\text{Ac-W--}\underline{\text{I}}\underline{\text{NGK}}\text{-}\underline{\text{WTG}}\text{-NH}_2$                                                     |
| $\beta\text{cap-IHGK}$ | $\text{Ac-W}\underline{\text{I}}\underline{\text{TVT}}\text{-}\underline{\text{IHGK}}\text{-}\underline{\text{KIRV}}\underline{\text{WTG}}\text{-NH}_2$ |

manner, the H-bonding status of strand sites, the pattern should be even clearer in these peptides. Indeed, upfield  $\text{C}_\alpha$  and downfield  $\text{C}_\beta$  shifts are observed at the H-bonded sites and are more intense near the stabilizing  $\beta$ -cap. The shifts appearing in the capping motif are also retained in the extended hairpin, but are excluded from the present discussion; the TG residues do not reside at  $\phi/\psi$  torsional angles conforming to  $\beta$  structure.

terminal residues adjacent to the capping motif, which have to be in the register allowing the cross-strand hydrogen bonds to form, do not fray as much as is observed in many hairpins. If the alternating  $^{13}\text{C}_{\alpha/\beta}$  shifts reflect, in some

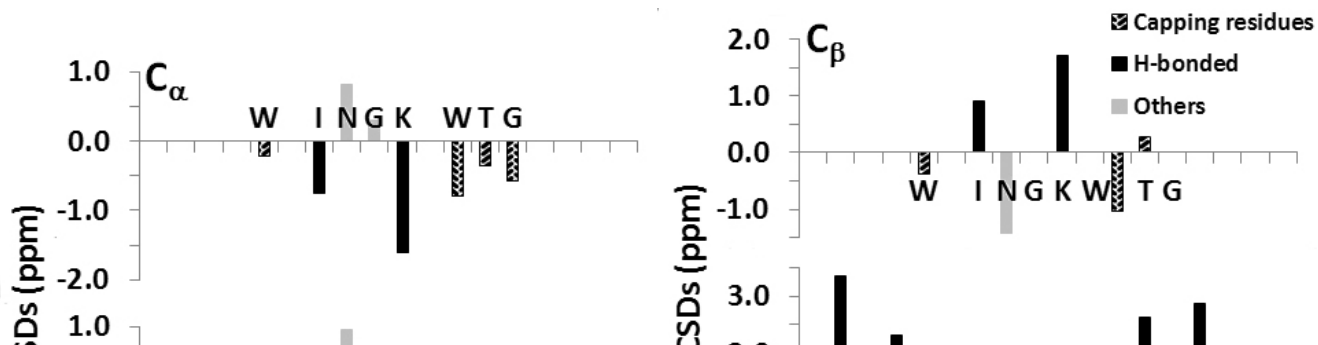

## References –

1. Fesinmeyer, R. M.; Hudson, F. M.; Olsen, K. A.; White, G. W. N.; Euser, A.; Andersen, N. H. *J. Biomol. NMR* **2005**, *33*, 213-231.
2. Andersen, N. H.; Olsen, K. A.; Fesinmeyer, R. M.; Tan, X.; Hudson, F. M.; Eidenschink, L. A.; Farazi, S. R. *J. Am. Chem. Soc.* **2006**, *128*, 6101-6110.
3. Kier, B. L.; Andersen, N. H. *J. Am. Chem. Soc.* **2008**, *130*, 14675-14683.
4. Eidenschink, L. A.; Kier, B. L.; Huggins, K. N. L.; Andersen, N. H. *Proteins Struct. Funct. Bioinf.* **2009**, *75*, 308-322.
5. Kier, B. L.; Shu, I.; Eidenschink, L. A.; Andersen, N. H. *Proc. Natl. Acad. Sci. U.S.A.* **2010**, *107*, 10466-10471.
6. Maynard, A. J.; Sharman, G. J.; Searle, M. S. *J. Am. Chem. Soc.* **1998**, *120*, 1996-2007.
7. Fesinmeyer, R. M.; Peterson, E. S.; Dyer, R. B.; Andersen, N. H. *Protein Sci.* **2005**, *14*, 2324-2332.
8. Vuister, G. W.; Bax, A. *J. Magn. Reson.* **1992**, *98*, 428-435.
9. Piotto, M.; Saudek, V.; Sklenar, V., *J. Biomol. NMR* **1992**, *2*, 661-665.
10. Bax, A.; Davis, D. G., *J. Magn. Reson.* **1985**, *65*, 355-360.
11. Wishart, D. S.; Bigam, C. G.; Holm, A.; Hodges, R. S.; Sykes, B. D. *J. Biomol. NMR* **1995**, *5*, 67-81.
12. Sibanda, B. L.; Thornton, J. M. *Methods Enzymol.* **1991**, *202*, 59-82.
